# Supplementary material for: MicroRNA-132 Negatively Regulates Palmitate-Induced NLRP3 Inflammasome Activation through FOXO3 Down-Regulation in THP-1 Cells
Source: PubMed Central journal article supplement (PMC5748820; doi:10.3390/nu9121370), 2017-12-18

**Supplementary Figure S1.** THP-1 cells were treated with 200  $\mu$ M PA or 1  $\mu$ g/mL LPS (as a positive control) for 12 h. (A) The mRNA levels of NLRP3, caspase-1, IL-18, and IL-1 $\beta$  were examined by quantitative RT-PCR. (B) Cell lysates and supernatants were subjected to immunoblotting using antibodies specific for NLRP3, caspase-1, IL-18, IL-1 $\beta$ , and  $\beta$ -actin. Relative protein levels were analyzed with ImageJ. (C) The levels of caspase-1 and IL-1 $\beta$  in the culture supernatants were determined by ELISA. \* $p < 0.05$  compared with PA-untreated THP-1 cells. (D) miR-132 expression was analyzed by quantitative RT-PCR. \* $p < 0.05$  compared with PA-untreated THP-1 cells. (E,F) FOXO3 mRNA and protein expression were analyzed by quantitative RT-PCR and Western blotting. \* $p < 0.05$  compared with PA-untreated THP-1 cells. (G) The effect of NF- $\kappa$ B silencing on PA-induced FOXO3 expression was determined by quantitative RT-PCR in THP-1 cells. NS, no significance.

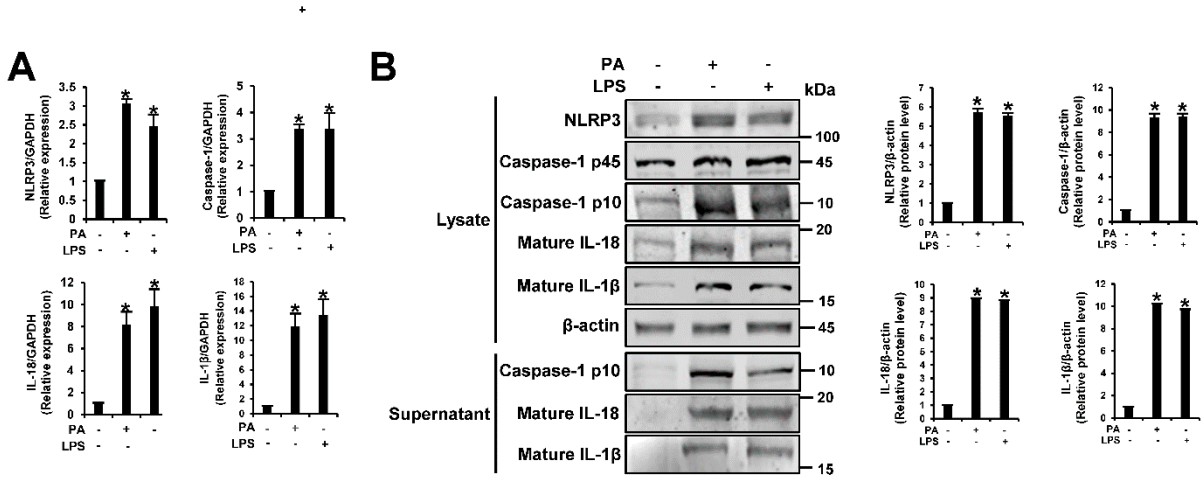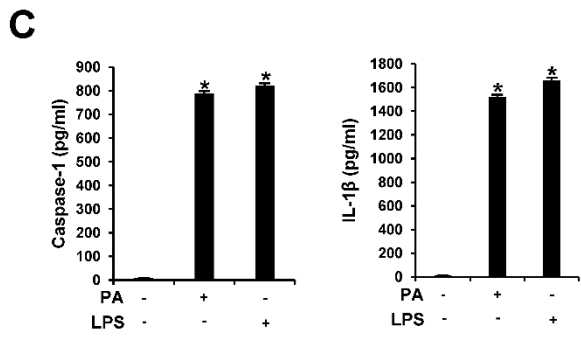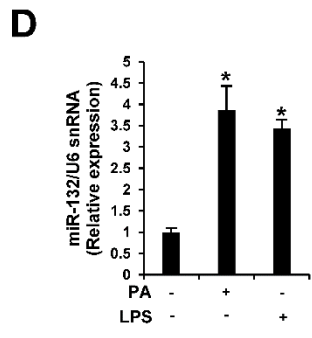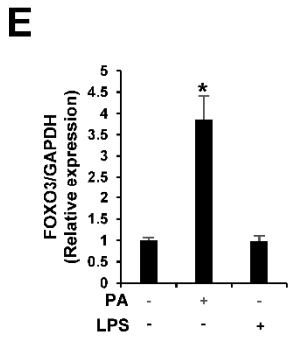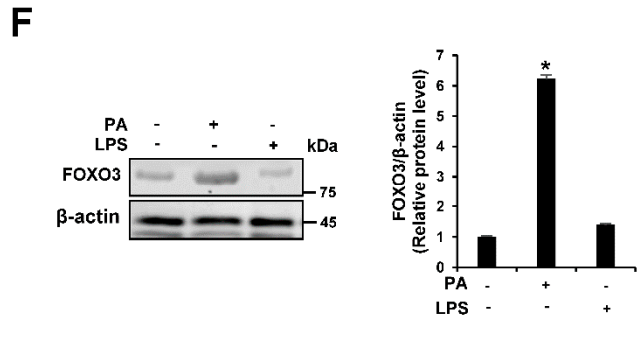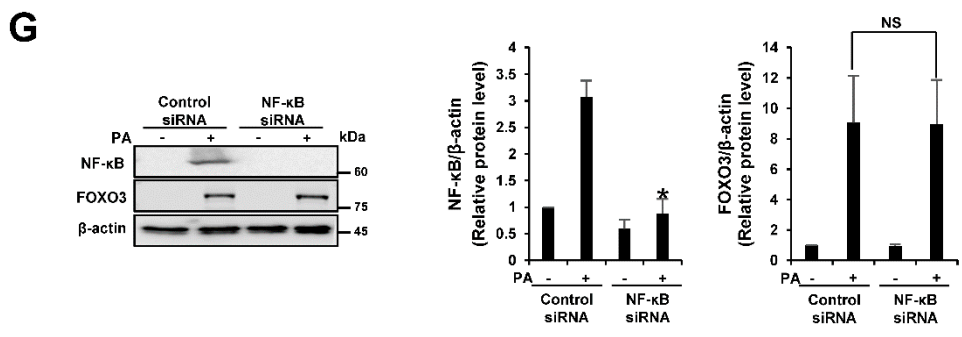

Supplement: nutrients-09-01370-s001.pdf [file nutrients-09-01370-s001.pdf]
